# Supplementary material for: A Review and Analysis of Water Research, Development, and Management in Bangladesh
Source: MDPI journal article supplement (doi:10.3390/w14121834), 2022-06-07
Supplement: s1 [file s1]

Archive with 1 entries (1 files):
- water-1745050-supplementary.pdf
