# Supplementary material for: A Review and Analysis of Water Research, Development, and Management in Bangladesh
Source: MDPI journal article supplement (doi:10.3390/w14121834), 2022-06-07
Supplement: s1 [file s1 › water-1745050-supplementary.pdf]

## Supplementary Materials

The query used in this study is as follow:

TITLE ( ( "Water resources" OR "Water sharing" OR "International rivers" OR "Hydrology" OR "Flood" OR "Water supply" OR "Water quality" OR "Waterlogging" OR "Farakkah Barrage" OR "Hydroelectricity" OR "Kaptai Dam" OR "Teesta Barrage" OR "Ganga-Kobadak Project" OR "Climate change" OR "Coastal cyclone" OR "River erosion" OR "Drought" OR "Groundwater" OR "Dredging" OR "Agriculture water use" OR "Crop water use" OR "Water navigation" OR "Water transportation" OR "Flood embankment" OR "Flood control " OR "Delta plan" OR "Surface water" OR "Water pollution" OR "Arsenic contamination" OR "Rainwater harvesting" OR "Water policy" OR "Bay of Bengal Salinity" OR "Coastal embankment" OR "Coastal zone protection" OR ( "Water" AND "society" ) OR "water scarcity" OR "Water sustainability" OR "Irrigation" OR "Drinking water" ) AND "Bangladesh\*" ) OR KEY ( ( "Water resources" OR "Water sharing" OR "International rivers" OR "Hydrology" OR "Flood" OR "Water supply" OR "Water quality" OR "Waterlogging" OR "Farakkah Barrage" OR "Hydroelectricity" OR "Kaptai Dam" OR "Teesta Barrage" OR "Ganga-Kobadak Project" OR "Climate change" OR "Coastal cyclone" OR "River erosion" OR "Drought" OR "Groundwater" OR "Dredging" OR "Agriculture water use" OR "Crop water use" OR "Water navigation" OR "Water transportation" OR "Flood embankment" OR "Flood control " OR "Delta plan" OR "Surface water" OR "Water pollution" OR "Arsenic contamination" OR "Rainwater harvesting" OR "Water policy" OR "Bay of Bengal Salinity" OR "Coastal embankment" OR "Coastal zone protection" OR ( "Water" AND "society" ) OR "water scarcity" OR "Water sustainability" OR "Irrigation" OR "Drinking water" ) AND "Bangladesh\*" ) AND ( LIMIT-TO ( SRCTYPE , "j" ) OR LIMIT-TO ( SRCTYPE , "p" ) OR LIMIT-TO ( SRCTYPE , "b" ) OR LIMIT-TO ( SRCTYPE , "k" ) ) AND ( LIMIT-TO ( DOCTYPE , "ar" ) OR LIMIT-TO ( DOCTYPE , "cp" ) OR LIMIT-TO ( DOCTYPE , "ch" ) OR LIMIT-TO ( DOCTYPE , "re" ) OR LIMIT-TO ( DOCTYPE , "bk" ) ) AND ( EXCLUDE ( PUBYEAR , 2022 ) ) AND ( LIMIT-TO ( LANGUAGE , "English" ) )

**Table S1.** The most productive institutions, 1972–2021

| Rank | Affiliation                                                     | Documents |
|------|-----------------------------------------------------------------|-----------|
| 1    | University of Dhaka                                             | 413       |
| 2    | International Centre for Diarrhoeal Disease Research Bangladesh | 339       |
| 3    | Bangladesh University of Engineering and Technology             | 230       |
| 4    | Columbia University                                             | 194       |
| 5    | Rajshahi University                                             | 153       |
| 6    | Jahangirnagar University                                        | 153       |
| 7    | Bangladesh Agricultural University                              | 140       |
| 8    | Lamont-Doherty Earth Observatory                                | 122       |
| 9    | Columbia University Irving Medical Center                       | 108       |
| 10   | Shahjalal University of Science and Technology                  | 102       |
| 11   | University of Chittagong                                        | 84        |
| 12   | Khulna University                                               | 83        |
| 13   | Johns Hopkins Bloomberg School of Public Health                 | 82        |

|    |                                        |    |
|----|----------------------------------------|----|
| 14 | Stanford University                    | 79 |
| 15 | Bangladesh Rural Advancement Committee | 69 |
| 16 | The University of Chicago              | 66 |
| 17 | The Royal Institute of Technology KTH  | 61 |
| 18 | University of California, Berkeley     | 61 |
| 19 | University College London              | 59 |
| 20 | Bangladesh Water Development Board     | 59 |

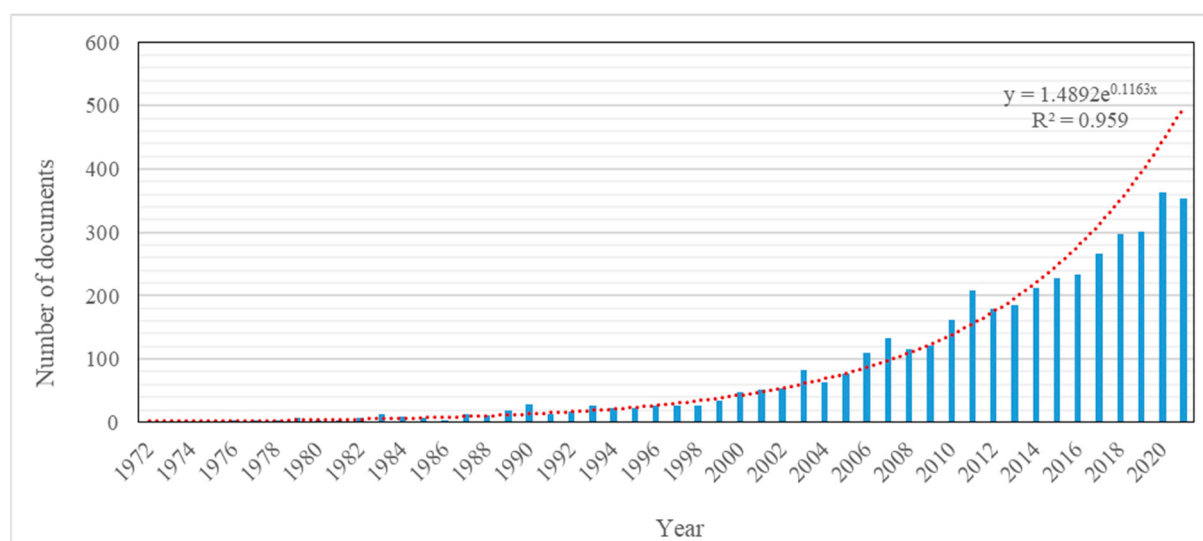

**Figure S1.** Trending of publications over time, 1972–2021

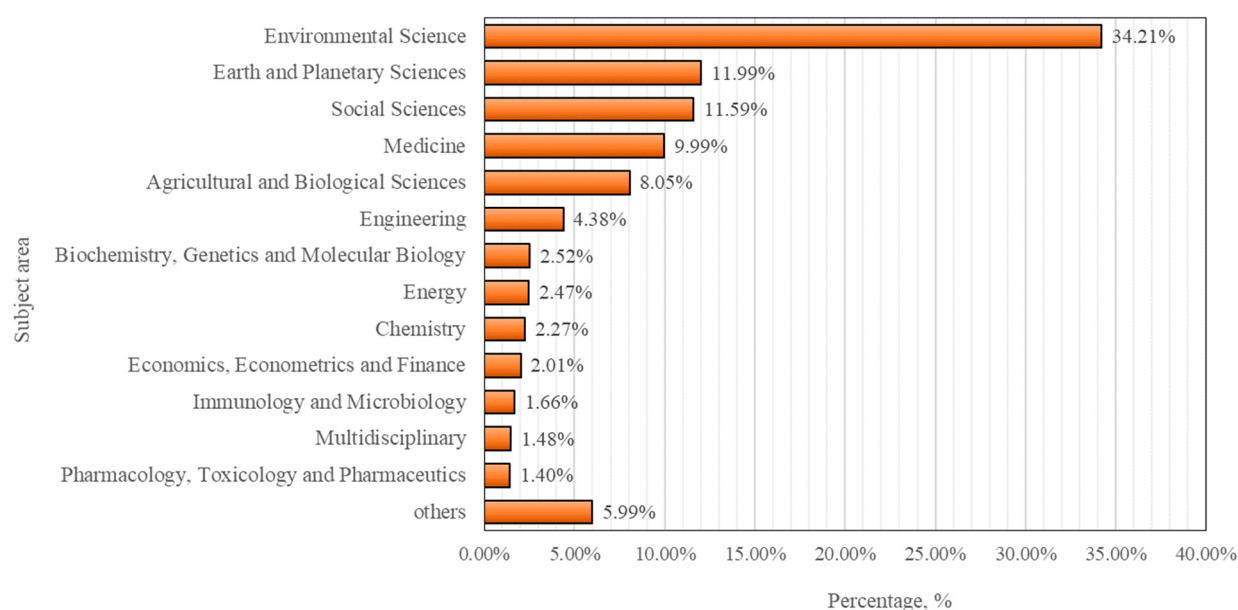

**Figure S2.** Distributions of documents by subject area, 1972–2021

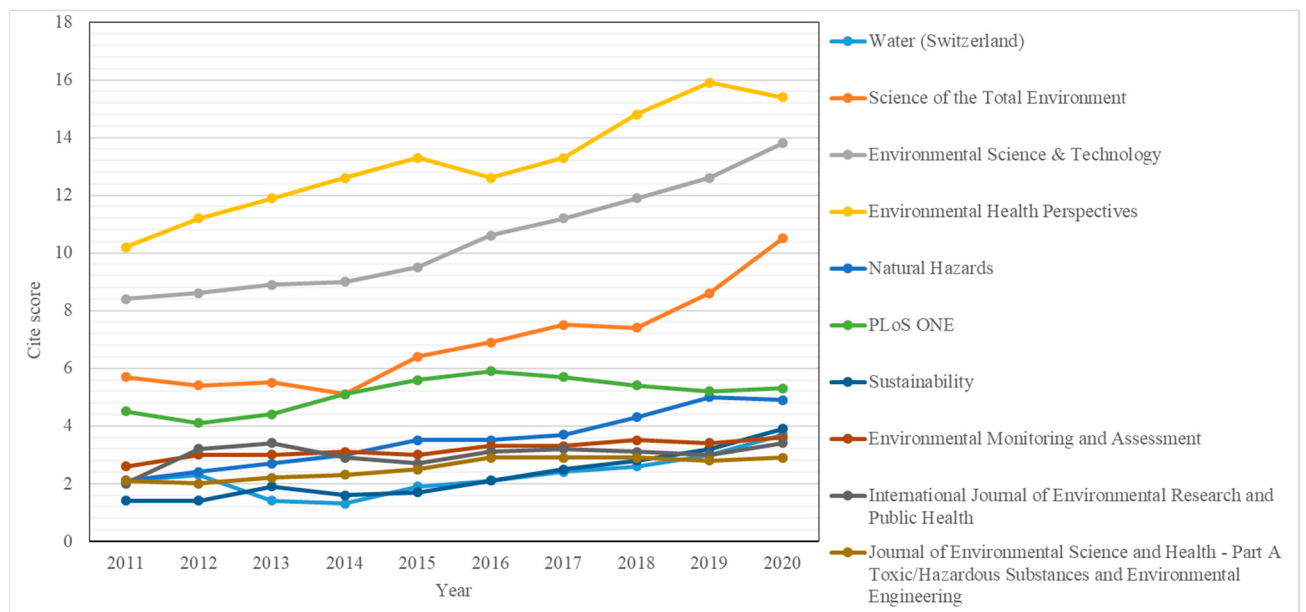

**Figure S3.** The most productive sources and their cite scores in last 10 years

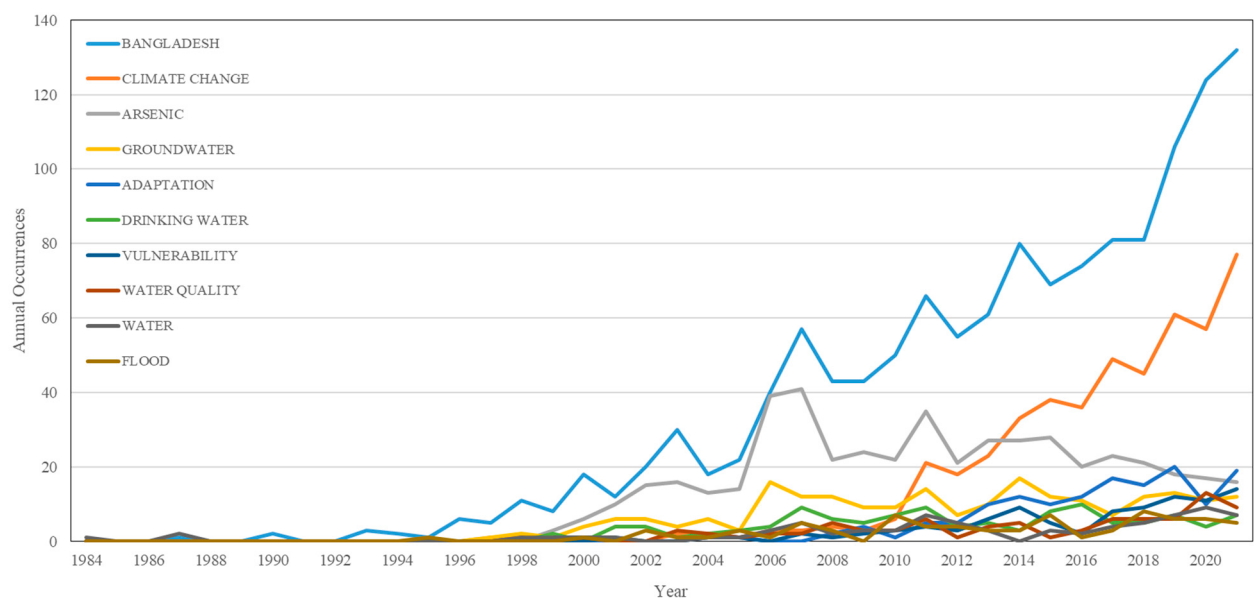

**Figure S4.** The most used keywords dynamics over time based on annual occurrences

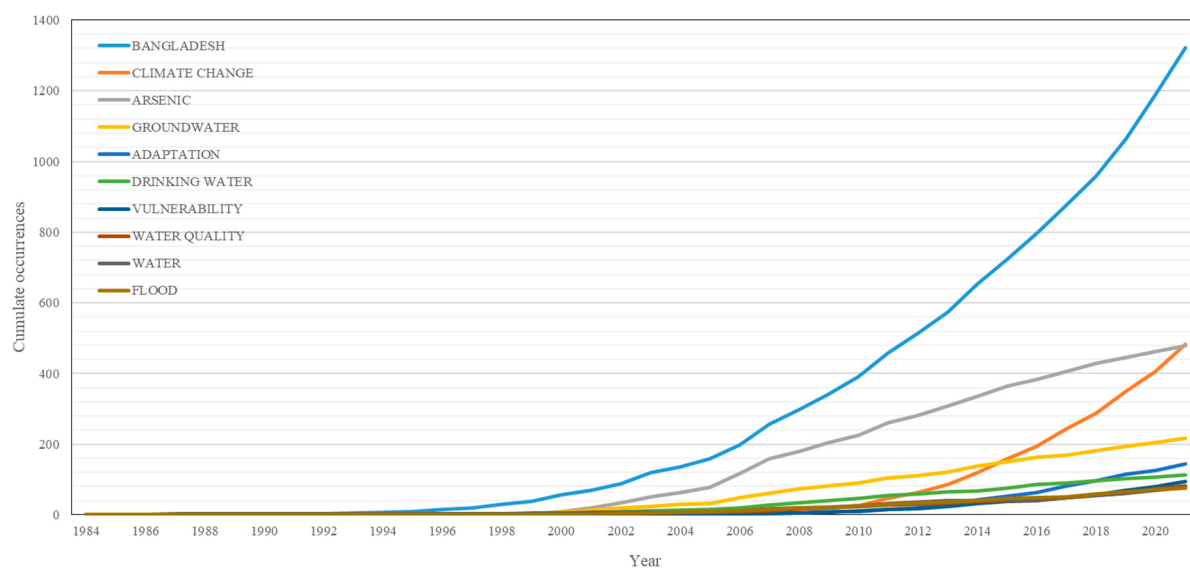

**Figure S5.** The most used keywords dynamics over time based on cumulative occurrences

**Table S2.** The most local cited documents

| Rank | Author       | DOI                             | Year | Local* Citations | Global** Citations |
|------|--------------|---------------------------------|------|------------------|--------------------|
| 1    | Smith AH     | DOI N/A click to find document  | 2000 | 216              | 1429               |
| 2    | Harvey CF    | 10.1126/science.1076978         | 2002 | 184              | 913                |
| 3    | Nickson RT   | 10.1016/S0883-2927(99)00086-4   | 2000 | 143              | 999                |
| 4    | Ahmed KM     | 10.1016/j.apgeochem.2003.09.006 | 2004 | 119              | 475                |
| 5    | Mcarthur JM  | 10.1029/2000WR900270            | 2001 | 111              | 660                |
| 6    | Frumkin H    | 10.3322/canjclin.51.4.254       | 2001 | 108              | 38                 |
| 7    | Shahid S     | 10.1007/s11069-007-9191-5       | 2008 | 105              | 276                |
| 8    | Meharg AA    | 10.1021/es0259842               | 2003 | 105              | 747                |
| 9    | Van Geen A   | DOI N/A click to find document  | 2002 | 94               | 172                |
| 10   | Van Geen A   | 10.1029/2002WR001617            | 2003 | 91               | 276                |
| 11   | Dhar RK      | DOI N/A click to find document  | 1997 | 91               | 342                |
| 12   | Ahmed MF     | 10.1126/science.1133146         | 2006 | 90               | 217                |
| 13   | Karim MF     | 10.1016/j.gloenvcha.2008.05.002 | 2008 | 88               | 338                |
| 14   | Wasserman GA | 10.1289/ehp.6964                | 2004 | 84               | 509                |
| 15   | Cheng Z      | 10.1007/s00216-004-2618-x       | 2004 | 83               | 146                |

\* Local citations present citations within the 4177 documents

\*\*Global citations present actual Scopus citations.
